# Supplementary material for: Toxicity of Cry- and Vip3Aa-Class Proteins and Their Interactions against Spodoptera frugiperda (Lepidoptera: Noctuidae)
Source: MDPI journal article supplement (doi:10.3390/toxins16040193), 2024-04-16
Supplement: s1 [file s1]

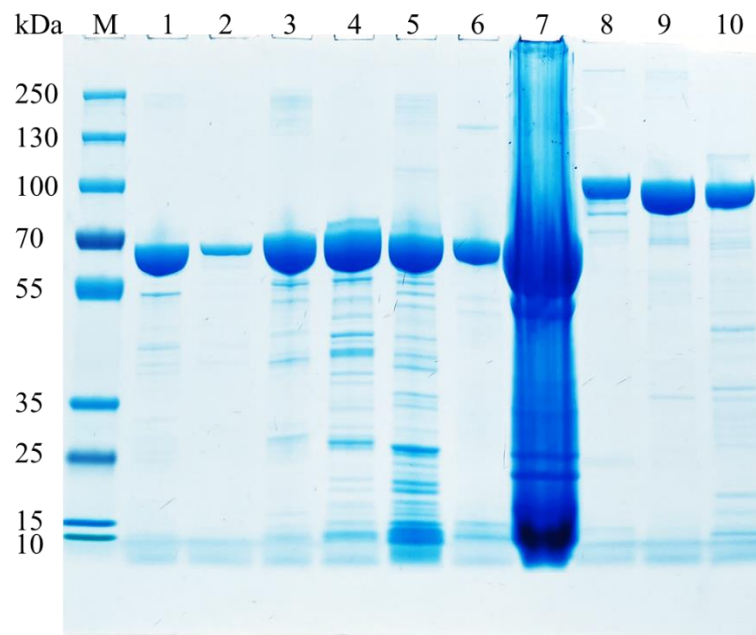

**Figure S1.** Bt proteins.

Notes: M: marker; 1: Cry1Ab; 2: Cry1Ac; 3: Cry1B; 4: Cry1Ca; 5: Cry2Aa; 6: Cry2Ab; 7: Cry1F; 8: Vip3Aa11; 9: Vip3Aa19; 10: Vip3Aa20. All the Bt proteins are trypsin-activated.
