# Supplementary material for: Toxicity of Cry- and Vip3Aa-Class Proteins and Their Interactions against Spodoptera frugiperda (Lepidoptera: Noctuidae)
Source: Toxins (Basel). 2024 Apr 16;16(4):193. doi: 10.3390/toxins16040193 (PMC11053954; doi:10.3390/toxins16040193)
Supplement: Supplementary file 1 [file toxins-16-00193-s001.zip › Table S1.xlsx]

## Sheet: 浓度
Bt proteins	concentration (ng/cm2)		Cry1Ab+Cry1F	浓度梯度ng/cm2		Cry1Ab+Vip3Aa11	浓度梯度ng/cm2		Cry1F+Vip3Aa11	浓度梯度ng/cm2			Cry2Ab+Vip3Aa11	浓度梯度ng/cm2
	2000		1：1	200		1：1	400		1：1	200			1：1	200
Cry1Ab	1000			100			200			100				100
	500			50			100			50				50
	250			25			50			25				25
	125			12.5			25			12.5				12.5
	62.5			6.25			12.5			6.25				6.25
	31.25			3.125			6.25			3.125				3.125
	15.625			1.5625			3.125			1.5625				1.5625
	7.8125			0.78125			0			0.78125				0.78125
	0			0						0				0
	浓度梯度ng/cm2		Cry1Ab+Cry2Ab	浓度梯度ng/cm2		Cry1Ab+Vip3Aa11	浓度梯度ng/cm2		Cry1F+Vip3Aa11	浓度梯度ng/cm2			Cry2Ab+Vip3Aa11	浓度梯度ng/cm2
Cry1Ac	10000		1：1	400		1：2	400		1：2	200			1：2	200
	5000			200			200			100				100
	2500			100			100			50				50
	1250			50			50			25				25
	625			25			25			12.5				12.5
	312.5			12.5			12.5			6.25				6.25
	156.25			6.25			6.25			3.125				3.125
	0			3.125			3.125			1.5625				1.5625
				0			1.5625			0.78125				0.78125
Cry1B	浓度梯度ng/cm2						0			0				0
	25000
	12500		Cry1F+Cry2Ab	浓度梯度ng/cm2		Cry1Ab+Vip3Aa11	浓度梯度ng/cm2		Cry1F+Vip3Aa11	浓度梯度ng/cm2			Cry2Ab+Vip3Aa11	浓度梯度ng/cm2
	6250		1：1	200		2：1	800		2：1	200			2：1	200
	3125			100			400			100				100
	1562.5			50			200			50				50
	781.25			25			100			25				25
	390.625			12.5			50			12.5				12.5
	195.312			6.25			25			6.25				6.25
	97.6562			3.125			12.5			3.125				3.125
	48.8281			1.5625			6.25			1.5625				1.5625
	0			0			3.125			0.78125				0.78125
							0			0				0
	浓度梯度ng/cm2
Cry1Ca	10000					Cry1Ab+Vip3Aa11	浓度梯度ng/cm2		Cry1F+Vip3Aa11	浓度梯度ng/cm2			Cry2Ab+Vip3Aa11	浓度梯度ng/cm2
	5000					1：5	400		1：5	200			1：5	200
	2500						200			100				100
	1250						100			50				50
	625						50			25				25
	312.5						25			12.5				12.5
	156.25						12.5			6.25				6.25
	0						6.25			3.125				3.125
							3.125			1.5625				1.5625
	浓度梯度ng/cm2						1.5625			0.78125				0.78125
	800						0			0				0
Cry1F	400
	200					Cry1Ab+Vip3Aa11	浓度梯度ng/cm2		Cry1F+Vip3Aa11	浓度梯度ng/cm2			Cry2Ab+Vip3Aa11	浓度梯度ng/cm2
	100					5：1	1600		5：1	200			5：1	200
	50						800			100				100
	25						400			50				50
	12.5						200			25				25
	6.25						100			12.5				12.5
	3.125						50			6.25				6.25
	1.5625						25			3.125				3.125
	0						12.5			1.5625				1.5625
							6.25			0.78125				0.78125
	浓度梯度ng/cm2						0			0				0
	10000
Cry2Aa	5000
	2500
	1250					Cry1Ab+Vip3Aa19	浓度梯度ng/cm2		Cry1F+Vip3Aa19	浓度梯度ng/cm2			Cry2Ab+Vip3Aa19	浓度梯度ng/cm2
	625					1：1	100		1：1	200			1：1	200
	312.5						50			100				100
	156.25						25			50				50
	0						12.5			25				25
							6.25			12.5				12.5
							3.125			6.25				6.25
Cry2Ab	浓度梯度ng/cm2						1.5625			3.125				3.125
	2000						0.78125			1.5625				1.5625
	1000						0.390625			0				0.78125
	500						0							0
	250
	125					Cry1Ab+Vip3Aa19	浓度梯度ng/cm2		Cry1F+Vip3Aa19	浓度梯度ng/cm2			Cry2Ab+Vip3Aa19	浓度梯度ng/cm2
	62.5					1：2	200		1：2	200			1：2	200
	31.25						100			100				100
	0						50			50				50
							25			25				25
	浓度梯度ng/cm2						12.5			12.5				12.5
	400						6.25			6.25				6.25
Vip3Aa11	200						3.125			3.125				3.125
	100						1.5625			1.5625				1.5625
	50						0			0				0.78125
	25													0
	12.5
	6.25					Cry1Ab+Vip3Aa19	浓度梯度ng/cm2		Cry1F+Vip3Aa19	浓度梯度ng/cm2			Cry2Ab+Vip3Aa19	浓度梯度ng/cm2
	0					2：1	400		2：1	200			2：1	200
							200			100				100
	浓度梯度ng/cm2						100			50				50
Vip3Aa19	400						50			25				25
	200						25			12.5				12.5
	100						12.5			6.25				6.25
	50						6.25			3.125				3.125
	25						3.125			1.5625				1.5625
	12.5						0			0				0.78125
	6.25													0
	3.125
	0						浓度梯度ng/cm2		Cry1F+Vip3Aa19	浓度梯度ng/cm2			Cry2Ab+Vip3Aa19	浓度梯度ng/cm2
						Cry1Ab+Vip3Aa19	100		1：5	200			1：5	200
	浓度梯度ng/cm2					1：5	50			100				100
	400						25			50				50
Vip3Aa20	200						12.5			25				25
	100						6.25			12.5				12.5
	50						3.125			6.25				6.25
	25						1.5625			3.125				3.125
	12.5						0.78125			1.5625				1.5625
	6.25						0.390625			0				0.78125
	0						0							0
						Cry1Ab+Vip3Aa19	浓度梯度ng/cm2		Cry1F+Vip3Aa19	浓度梯度ng/cm2			Cry2Ab+Vip3Aa19	浓度梯度ng/cm2
						5：1	1600		5：1	200			5：1	200
							800			100				100
							400			50				50
							200			25				25
							100			12.5				12.5
			65.12				50			6.25				6.25
							25			3.125				3.125
							12.5			1.5625				1.5625
							6.25			0				0.78125
							3.125							0
							0
						Cry1Ab+Vip3Aa20	浓度梯度ng/cm2		Cry1F+Vip3Aa20	浓度梯度ng/cm2			Cry2Ab+Vip3Aa20	浓度梯度ng/cm2
						1：1	400		1：1	200			1：1	200
							200			100				100
							100			50				50
							50			25				25
							25			12.5				12.5
							12.5			6.25				6.25
							6.25			3.125				3.125
							3.125			1.5625				1.5625
							1.5625			0.78125				0.78125
							0			0				0
						Cry1Ab+Vip3Aa20	浓度梯度ng/cm2		Cry1F+Vip3Aa20	浓度梯度ng/cm2			Cry2Ab+Vip3Aa20	浓度梯度ng/cm2
						1：2	400		1：2	200			1：2	200
							200			100				100
							100			50				50
							50			25				25
							25			12.5				12.5
							12.5			6.25				6.25
							6.25			3.125				3.125
							3.125			1.5625				1.5625
							1.5625			0.78125				0.78125
							0			0				0
						Cry1Ab+Vip3Aa20	浓度梯度ng/cm2		Cry1F+Vip3Aa20	浓度梯度ng/cm2			Cry2Ab+Vip3Aa20	浓度梯度ng/cm2
						2：1	800		2：1	200			2：1	200
							400			100				100
							200			50				50
							100			25				25
							50			12.5				12.5
							25			6.25				6.25
							12.5			3.125				3.125
							6.25			1.5625				1.5625
							3.125			0				0.78125
							0							0
						Cry1Ab+Vip3Aa20	浓度梯度ng/cm2		Cry1F+Vip3Aa20	浓度梯度ng/cm2			Cry2Ab+Vip3Aa20	浓度梯度ng/cm2
						1：5	400		1：5	200			1：5	200
							200			100				100
							100			50				50
							50			25				25
							25			12.5				12.5
							12.5			6.25				6.25
							6.25			3.125				3.125
							3.125			1.5625				1.5625
							1.5625			0.78125				0.78125
							0			0				0
						Cry1Ab+Vip3Aa20	浓度梯度ng/cm2		Cry1F+Vip3Aa20	浓度梯度ng/cm2			Cry2Ab+Vip3Aa20	浓度梯度ng/cm2
						5：1	1600		5：1	200			5：1	200
							800			100				100
							400			50				50
							200			25				25
							100			12.5				12.5
							50			6.25				6.25
							25			3.125				3.125
							12.5			1.5625				1.5625
							6.25			0.78125				0.78125
							0			0				0

## Sheet: Sheet1
	Cry1Ab+Vip3Aa11	浓度梯度ng/cm2		Cry1F+Vip3Aa11	浓度梯度ng/cm2			Cry2Ab+Vip3Aa11	浓度梯度ng/cm2
	1：1	400		1：1	200			1：1	200
		200			100				100
		100			50				50
		50			25				25
		25			12.5				12.5
		12.5			6.25				6.25
		6.25			3.125				3.125
		3.125			1.5625				1.5625
		0			0.78125				0.78125
					0				0
	Cry1Ab+Vip3Aa11	浓度梯度ng/cm2		Cry1F+Vip3Aa11	浓度梯度ng/cm2			Cry2Ab+Vip3Aa11	浓度梯度ng/cm2
	1：2	400		1：2	200			1：2	200
		200			100				100
		100			50				50
		50			25				25
		25			12.5				12.5
		12.5			6.25				6.25
		6.25			3.125				3.125
		3.125			1.5625				1.5625
		1.5625			0.78125				0.78125
		0			0				0
	Cry1Ab+Vip3Aa11	浓度梯度ng/cm2		Cry1F+Vip3Aa11	浓度梯度ng/cm2			Cry2Ab+Vip3Aa11	浓度梯度ng/cm2
	2：1	800		2：1	200			2：1	200
		400			100				100
		200			50				50
		100			25				25
		50			12.5				12.5
		25			6.25				6.25
		12.5			3.125				3.125
		6.25			1.5625				1.5625
		3.125			0.78125				0.78125
		0			0				0
	Cry1Ab+Vip3Aa11	浓度梯度ng/cm2		Cry1F+Vip3Aa11	浓度梯度ng/cm2			Cry2Ab+Vip3Aa11	浓度梯度ng/cm2
	1：5	400		1：5	200			1：5	200
		200			100				100
		100			50				50
		50			25				25
		25			12.5				12.5
		12.5			6.25				6.25
		6.25			3.125				3.125
		3.125			1.5625				1.5625
		1.5625			0.78125				0.78125
		0			0				0
	Cry1Ab+Vip3Aa11	浓度梯度ng/cm2		Cry1F+Vip3Aa11	浓度梯度ng/cm2			Cry2Ab+Vip3Aa11	浓度梯度ng/cm2
	5：1	1600		5：1	200			5：1	200
		800			100				100
		400			50				50
		200			25				25
		100			12.5				12.5
		50			6.25				6.25
		25			3.125				3.125
		12.5			1.5625				1.5625
		6.25			0.78125				0.78125
		0			0				0
	Cry1Ab+Vip3Aa19	浓度梯度ng/cm2		Cry1F+Vip3Aa19	浓度梯度ng/cm2			Cry2Ab+Vip3Aa19	浓度梯度ng/cm2
	1：1	100		1：1	200			1：1	200
		50			100				100
		25			50				50
		12.5			25				25
		6.25			12.5				12.5
		3.125			6.25				6.25
		1.5625			3.125				3.125
		0.78125			1.5625				1.5625
		0.390625			0				0.78125
		0							0
	Cry1Ab+Vip3Aa19	浓度梯度ng/cm2		Cry1F+Vip3Aa19	浓度梯度ng/cm2			Cry2Ab+Vip3Aa19	浓度梯度ng/cm2
	1：2	200		1：2	200			1：2	200
		100			100				100
		50			50				50
		25			25				25
		12.5			12.5				12.5
		6.25			6.25				6.25
		3.125			3.125				3.125
		1.5625			1.5625				1.5625
		0			0				0.78125
									0
	Cry1Ab+Vip3Aa19	浓度梯度ng/cm2		Cry1F+Vip3Aa19	浓度梯度ng/cm2			Cry2Ab+Vip3Aa19	浓度梯度ng/cm2
	2：1			2：1	200			2：1	200
	400				100				100
	200				50				50
	100				25				25
	50				12.5				12.5
	25				6.25				6.25
	12.5				3.125				3.125
	6.25				1.5625				1.5625
	3.125				0				0.78125
	0								0
		浓度梯度ng/cm2		Cry1F+Vip3Aa19	浓度梯度ng/cm2			Cry2Ab+Vip3Aa19	浓度梯度ng/cm2
	Cry1Ab+Vip3Aa19	100		1：5	200			1：5	200
	1：5	50			100				100
		25			50				50
		12.5			25				25
		6.25			12.5				12.5
		3.125			6.25				6.25
		1.5625			3.125				3.125
		0.78125			1.5625				1.5625
		0.390625			0				0.78125
		0							0
	Cry1Ab+Vip3Aa19	浓度梯度ng/cm2		Cry1F+Vip3Aa19	浓度梯度ng/cm2			Cry2Ab+Vip3Aa19	浓度梯度ng/cm2
	5：1	1600		5：1	200			5：1	200
		800			100				100
		400			50				50
		200			25				25
		100			12.5				12.5
		50			6.25				6.25
		25			3.125				3.125
		12.5			1.5625				1.5625
		6.25			0				0.78125
		3.125							0
		0
	Cry1Ab+Vip3Aa20	浓度梯度ng/cm2		Cry1F+Vip3Aa20	浓度梯度ng/cm2			Cry2Ab+Vip3Aa20	浓度梯度ng/cm2
	1：1	400		1：1	200			1：1	200
		200			100				100
		100			50				50
		50			25				25
		25			12.5				12.5
		12.5			6.25				6.25
		6.25			3.125				3.125
		3.125			1.5625				1.5625
		1.5625			0.78125				0.78125
		0			0				0
	Cry1Ab+Vip3Aa20	浓度梯度ng/cm2		Cry1F+Vip3Aa20	浓度梯度ng/cm2			Cry2Ab+Vip3Aa20	浓度梯度ng/cm2
	1：2	400		1：2	200			1：2	200
		200			100				100
		100			50				50
		50			25				25
		25			12.5				12.5
		12.5			6.25				6.25
		6.25			3.125				3.125
		3.125			1.5625				1.5625
		1.5625			0.78125				0.78125
		0			0				0
	Cry1Ab+Vip3Aa20	浓度梯度ng/cm2		Cry1F+Vip3Aa20	浓度梯度ng/cm2			Cry2Ab+Vip3Aa20	浓度梯度ng/cm2
	2：1	800		2：1	200			2：1	200
		400			100				100
		200			50				50
		100			25				25
		50			12.5				12.5
		25			6.25				6.25
		12.5			3.125				3.125
		6.25			1.5625				1.5625
		3.125			0				0.78125
		0							0
	Cry1Ab+Vip3Aa20	浓度梯度ng/cm2		Cry1F+Vip3Aa20	浓度梯度ng/cm2			Cry2Ab+Vip3Aa20	浓度梯度ng/cm2
	1：5	400		1：5	200			1：5	200
		200			100				100
		100			50				50
		50			25				25
		25			12.5				12.5
		12.5			6.25				6.25
		6.25			3.125				3.125
		3.125			1.5625				1.5625
		1.5625			0.78125				0.78125
		0			0				0
	Cry1Ab+Vip3Aa20	浓度梯度ng/cm2		Cry1F+Vip3Aa20	浓度梯度ng/cm2			Cry2Ab+Vip3Aa20	浓度梯度ng/cm2
	5：1	1600		5：1	200			5：1	200
		800			100				100
		400			50				50
		200			25				25
		100			12.5				12.5
		50			6.25				6.25
		25			3.125				3.125
		12.5			1.5625				1.5625
		6.25			0.78125				0.78125
		0			0				0

## Sheet: Sheet2
Bt proteins	Cry1Ab	Cry1Ac	Cry1B	Cry1Ca	Cry1F	Cry2Aa	Cry2Ab	Vip3Aa11	Vip3Aa19	Vip3Aa20
concentration (ng/cm2)	2000	10000	25000	10000	800	10000	2000	400	400	400
	1000	5000	12500	5000	400	5000	1000	200	200	200
	500	2500	6250	2500	200	2500	500	100	100	100
	250	1250	3125	1250	100	1250	250	50	50	50
	125	625	1562.5	625	50	625	125	25	25	25
	62.5	312.5	781.25	312.5	25	312.5	62.5	12.5	12.5	12.5
	31.25	156.25	390.625	156.25	12.5	156.25	31.25	6.25	6.25	6.25
	15.625	0	195.312	0	6.25	0	0	0	3.125	0
	7.8125		97.6562		3.125				0
	0		48.8281		1.5625
			0		0
Bt proteins	Cry1Ab+Cry1F	Cry1Ab+Cry2Ab	Cry1F+Cry2Ab
Ratio	1：1	1：1	1：1
concentration (ng/cm2)	200	400	200
	100	200	100
	50	100	50
	25	50	25
	12.5	25	12.5
	6.25	12.5	6.25
	3.125	6.25	3.125
	1.5625	3.125	1.5625
	0.78125	0	0
	0
Bt proteins	Cry1Ab+Vip3Aa11							Cry1Ab+Vip3Aa19							Cry1Ab+Vip3Aa20
Ratio	1：1	1：2	2：1	1：5	5：1			1：1	1：2	2：1	1：5	5：1			1：1	1：2	2：1	1：5	5：1
concentration (ng/cm2)	400	400	800	400	1600			100	200	400	100	1600			400	400	800	400	1600
	200	200	400	200	800			50	100	200	50	800			200	200	400	200	800
	100	100	200	100	400			25	50	100	25	400			100	100	200	100	400
	50	50	100	50	200			12.5	25	50	12.5	200			50	50	100	50	200
	25	25	50	25	100			6.25	12.5	25	6.25	100			25	25	50	25	100
	12.5	12.5	25	12.5	50			3.125	6.25	12.5	3.125	50			12.5	12.5	25	12.5	50
	6.25	6.25	12.5	6.25	25			1.5625	3.125	6.25	1.5625	25			6.25	6.25	12.5	6.25	25
	3.125	3.125	6.25	3.125	12.5			0.78125	1.5625	3.125	0.78125	12.5			3.125	3.125	6.25	3.125	12.5
	0	1.5625	3.125	1.5625	6.25			0.390625	0	0	0.390625	6.25			1.5625	1.5625	3.125	1.5625	6.25
		0	0	0	0			0			0	3.125			0	0	0	0	0
												0
Bt proteins	Cry1F+Vip3Aa11							Cry1F+Vip3Aa19							Cry1F+Vip3Aa20
Ratio	1：1	1：2	2：1	1：5	5：1			1：1	1：2	2：1	1：5	5：1			1：1	1：2	2：1	1：5	5：1
concentration (ng/cm2)	200	200	200	200	200			200	200	200	200	200			200	200	200	200	200
	100	100	100	100	100			100	100	100	100	100			100	100	100	100	100
	50	50	50	50	50			50	50	50	50	50			50	50	50	50	50
	25	25	25	25	25			25	25	25	25	25			25	25	25	25	25
	12.5	12.5	12.5	12.5	12.5			12.5	12.5	12.5	12.5	12.5			12.5	12.5	12.5	12.5	12.5
	6.25	6.25	6.25	6.25	6.25			6.25	6.25	6.25	6.25	6.25			6.25	6.25	6.25	6.25	6.25
	3.125	3.125	3.125	3.125	3.125			3.125	3.125	3.125	3.125	3.125			3.125	3.125	3.125	3.125	3.125
	1.5625	1.5625	1.5625	1.5625	1.5625			1.5625	1.5625	1.5625	1.5625	1.5625			1.5625	1.5625	1.5625	1.5625	1.5625
	0.78125	0.78125	0.78125	0.78125	0.78125			0	0	0	0	0			0.78125	0.78125	0	0.78125	0.78125
	0	0	0	0	0										0	0		0	0
Bt proteins	Cry2Ab+Vip3Aa11							Cry2Ab+Vip3Aa19							Cry2Ab+Vip3Aa20
Ratio	1：1	1：2	2：1	1：5	5：1			1：1	1：2	2：1	1：5	5：1			1：1	1：2	2：1	1：5	5：1
concentration (ng/cm2)	200	200	200	200	200			200	200	200	200	200			200	200	200	200	200
	100	100	100	100	100			100	100	100	100	100			100	100	100	100	100
	50	50	50	50	50			50	50	50	50	50			50	50	50	50	50
	25	25	25	25	25			25	25	25	25	25			25	25	25	25	25
	12.5	12.5	12.5	12.5	12.5			12.5	12.5	12.5	12.5	12.5			12.5	12.5	12.5	12.5	12.5
	6.25	6.25	6.25	6.25	6.25			6.25	6.25	6.25	6.25	6.25			6.25	6.25	6.25	6.25	6.25
	3.125	3.125	3.125	3.125	3.125			3.125	3.125	3.125	3.125	3.125			3.125	3.125	3.125	3.125	3.125
	1.5625	1.5625	1.5625	1.5625	1.5625			1.5625	1.5625	1.5625	1.5625	1.5625			1.5625	1.5625	1.5625	1.5625	1.5625
	0.78125	0.78125	0.78125	0.78125	0.78125			0.78125	0.78125	0.78125	0.78125	0.78125			0.78125	0.78125	0.78125	0.78125	0.78125
	0	0	0	0	0			0	0	0	0	0			0	0	0	0	0
For each concentration of Bt protein (single/combination), twenty-four neonate larvae were used as a replicate and 3 replicates were performed for each concentration (a total of 72 larvae per concentration).
